# Supplementary material
Source: bioRxiv or medRxiv preprint supplement (https://www.biorxiv.org/highwire/filestream/26969/field_highwire_adjunct_files/11/095349-9.pdf)
Supplement: Supplementary file [file 095349-9.pdf]

| Top promoter[SNPs in top promoter]                              | Linkage                                                                                                                                                                                                                                                                                        | Corrected coexpression score | FDR  |
|-----------------------------------------------------------------|------------------------------------------------------------------------------------------------------------------------------------------------------------------------------------------------------------------------------------------------------------------------------------------------|------------------------------|------|
| p67@APOB [rs676210]                                             |                                                                                                                                                                                                                                                                                                | 0.63                         | 0.0  |
| p@chr2:165603346..165603357,- [rs10178921]                      |                                                                                                                                                                                                                                                                                                | 0.56                         | 0.01 |
| p@chr2:27528919..27528940,+ [rs4665963]                         |                                                                                                                                                                                                                                                                                                | 0.53                         | 0.01 |
|                                                                 | rs4665963:rs11684134 D'=0.8; r <sup>2</sup> =0.3.<br>p1@LOC100505624 [rs11684134]                                                                                                                                                                                                              | 0.42                         | 0.02 |
| p@chr7:73106975..73106980,+ [rs2293490]                         |                                                                                                                                                                                                                                                                                                | 0.52                         | 0.01 |
| p32@ACSL5 [rs11195943]                                          |                                                                                                                                                                                                                                                                                                | 0.51                         | 0.01 |
| p@chr11:116691448..116691464,- [rs5110, rs675]                  |                                                                                                                                                                                                                                                                                                | 0.5                          | 0.01 |
| p@chr19:45411878..45411884,- [rs7412]                           |                                                                                                                                                                                                                                                                                                | 0.5                          | 0.01 |
| p1@ZSWIM1 [rs3746497]                                           |                                                                                                                                                                                                                                                                                                | 0.5                          | 0.01 |
| p@chr7:17287199..17287204,+ [rs6968554]                         |                                                                                                                                                                                                                                                                                                | 0.49                         | 0.01 |
| p@chr6:31254912..31254928,- [rs9468920]                         |                                                                                                                                                                                                                                                                                                | 0.48                         | 0.01 |
| enhancer@chr7:72939749-72940060 [rs80189144]                    |                                                                                                                                                                                                                                                                                                | 0.48                         | 0.01 |
| p@chr12:124433988..124434017,- [rs2178663]                      |                                                                                                                                                                                                                                                                                                | 0.46                         | 0.01 |
| p1@BAG6 [rs3117582]                                             |                                                                                                                                                                                                                                                                                                | 0.45                         | 0.01 |
| p@chr6:52617751..52617757,- [rs2180314]                         |                                                                                                                                                                                                                                                                                                | 0.44                         | 0.01 |
| p@chr19:7184803..7184814,- [rs17253937]                         |                                                                                                                                                                                                                                                                                                | 0.43                         | 0.02 |
| p1@ENST00000518619 [rs17149760]                                 |                                                                                                                                                                                                                                                                                                | 0.42                         | 0.02 |
| p@chr20:44640866..44640875,- [rs3918256]                        |                                                                                                                                                                                                                                                                                                | 0.4                          | 0.03 |
| p@chr4:88057279..88057283,+ [rs1408]                            |                                                                                                                                                                                                                                                                                                | 0.4                          | 0.03 |
|                                                                 | rs1408:rs3755980 D'=1.0; r <sup>2</sup> =0.14.<br>p@chr4:88042092..88042099,- [rs3755980]                                                                                                                                                                                                      | 0.18                         | 0.45 |
| p1@ENST00000448198, p1@ENST00000455328 [rs3916765]              |                                                                                                                                                                                                                                                                                                | 0.38                         | 0.05 |
| enhancer@chr19:19483893-19484092 [rs59148799]                   |                                                                                                                                                                                                                                                                                                | 0.37                         | 0.05 |
| p1@NSUN5 [rs1880948]                                            |                                                                                                                                                                                                                                                                                                | 0.37                         | 0.05 |
| chr6:30798448..30798455,- [rs1264347]                           |                                                                                                                                                                                                                                                                                                | 0.37                         | 0.05 |
|                                                                 | rs1264347:rs886422 D'=1.0; r <sup>2</sup> =1.0. p23@DDR1 [rs886422]                                                                                                                                                                                                                            | 0.05                         | 0.82 |
| p2@LIPC [rs2070895]                                             |                                                                                                                                                                                                                                                                                                | 0.37                         | 0.05 |
| p@chr19:45487536..45487571,+ [rs16979600]                       |                                                                                                                                                                                                                                                                                                | 0.36                         | 0.06 |
|                                                                 | rs16979600:rs3760629 D'=1.0; r <sup>2</sup> =0.05. p3@CLPTM1 [rs3760629]                                                                                                                                                                                                                       | 0.13                         | 0.61 |
| p2@LY6G6C [rs805292]                                            |                                                                                                                                                                                                                                                                                                | 0.36                         | 0.06 |
| p@chr4:87873088..87873092,+ [rs1992876]                         |                                                                                                                                                                                                                                                                                                | 0.35                         | 0.07 |
| p@chr8:19782798..19782817,- [rs28522139]                        |                                                                                                                                                                                                                                                                                                | 0.34                         | 0.08 |
| p@chr8:11396776..11396795,+ [rs2409784]                         |                                                                                                                                                                                                                                                                                                | 0.33                         | 0.09 |
| chr2:28203328..28203338,+ [rs898031]                            |                                                                                                                                                                                                                                                                                                | 0.33                         | 0.09 |
|                                                                 | rs898031:rs2305929 D'=1.0; r <sup>2</sup> =0.1.<br>p@chr2:28114209..28114224,+ [rs2305929]                                                                                                                                                                                                     | 0.1                          | 0.68 |
| p1@HAX1 [rs11556341]                                            |                                                                                                                                                                                                                                                                                                | 0.33                         | 0.11 |
|                                                                 | same SNP, different promoter:<br>p@chr1:154244875..154244901,- [rs11556341]                                                                                                                                                                                                                    | 0.14                         | 0.61 |
| p@chr2:28634997..28635008,+ [rs12624279]                        |                                                                                                                                                                                                                                                                                                | 0.32                         | 0.11 |
| p1@ZNF646 [rs2303222]                                           |                                                                                                                                                                                                                                                                                                | 0.32                         | 0.11 |
| p2@F2 [rs2070852]                                               |                                                                                                                                                                                                                                                                                                | 0.3                          | 0.15 |
|                                                                 | rs2070852:rs7932354 D'=1.0; r <sup>2</sup> =1.0. p1@ARHGAP1 [rs7932354]                                                                                                                                                                                                                        | 0.13                         | 0.61 |
| enhancer@chr15:58712788-58712944 [rs11854624]                   |                                                                                                                                                                                                                                                                                                | 0.3                          | 0.16 |
|                                                                 | rs11854624:rs17821310 D'=1.0; r <sup>2</sup> =0.86. p1@LIPC [rs17821310]                                                                                                                                                                                                                       | 0.1                          | 0.68 |
| p1@ENST00000519197 [rs28597716]                                 |                                                                                                                                                                                                                                                                                                | 0.29                         | 0.18 |
| enhancer@chr11:47109490-47109615 [rs4319472]                    |                                                                                                                                                                                                                                                                                                | 0.28                         | 0.2  |
| p1@NAT2 [rs4646246]                                             |                                                                                                                                                                                                                                                                                                | 0.28                         | 0.21 |
| enhancer@chr16:56985400-56985562 [rs72786786, rs12448528]       |                                                                                                                                                                                                                                                                                                | 0.27                         | 0.23 |
| p@chr6:33153425..33153432,- [rs9277934]                         |                                                                                                                                                                                                                                                                                                | 0.27                         | 0.23 |
|                                                                 | rs9277934:rs2076311 D'=1.0; r <sup>2</sup> =1.0.<br>p@chr6:33145331..33145378,- [rs2076311]                                                                                                                                                                                                    | 0.07                         | 0.79 |
| enhancer@chr8:11032163-11032532 [rs6986032]                     |                                                                                                                                                                                                                                                                                                | 0.27                         | 0.23 |
| p@chr1:62928606..62928608,+ [rs998403]                          |                                                                                                                                                                                                                                                                                                | 0.27                         | 0.23 |
| p@chr1:63112277..63112278,+ [rs1168085]                         |                                                                                                                                                                                                                                                                                                | 0.26                         | 0.23 |
| p@chr6:32411003..32411021,- [rs13135391]                        |                                                                                                                                                                                                                                                                                                | 0.26                         | 0.25 |
| p11@SIDT2 [rs474339]                                            |                                                                                                                                                                                                                                                                                                | 0.25                         | 0.26 |
|                                                                 | rs474339:rs10892074 D'=1.0; r <sup>2</sup> =0.25.<br>p@chr11:116980715..116980720,- [rs10892074]                                                                                                                                                                                               | 0.14                         | 0.61 |
|                                                                 | rs474339:rs508487 D'=1.0; r <sup>2</sup> =0.37.<br>p@chr11:117075245..117075293,- [rs508487]                                                                                                                                                                                                   | 0.05                         | 0.82 |
| p@chr19:19640431..19640450,+ [rs4808967]                        |                                                                                                                                                                                                                                                                                                | 0.24                         | 0.3  |
|                                                                 | rs4808967:rs1063966 D'=1.0; r <sup>2</sup> =1.0.<br>p@chr19:19616795..19616800,+ [rs1063966]                                                                                                                                                                                                   | 0.17                         | 0.48 |
| p@chr8:19830089..19830095,+ [rs1569209]                         |                                                                                                                                                                                                                                                                                                | 0.24                         | 0.31 |
| pi@TIMD4 [rs6882076]                                            |                                                                                                                                                                                                                                                                                                | 0.23                         | 0.31 |
| enhancer@chr11:116722234-116722744 [rs689243]                   |                                                                                                                                                                                                                                                                                                | 0.23                         | 0.32 |
| p@chr11:47303410..47303414,+ [rs326217]                         |                                                                                                                                                                                                                                                                                                | 0.22                         | 0.34 |
| p@chr8:126442070..126442090,- [rs4871594]                       |                                                                                                                                                                                                                                                                                                | 0.21                         | 0.37 |
| p@chr2:27975692..27975750,+ [rs6547796]                         |                                                                                                                                                                                                                                                                                                | 0.21                         | 0.37 |
| p@chr1:63266602..63266609,- [rs11208033, rs10493328, rs4409690] |                                                                                                                                                                                                                                                                                                | 0.21                         | 0.37 |
|                                                                 | rs11208033:rs12122434 D'=1.0; r <sup>2</sup> =0.22.<br>p@chr1:63261897..63261900,+ [rs12122434];rs10493328:rs12122434 D'=1.0; r <sup>2</sup> =0.22.<br>p@chr1:63261897..63261900,+ [rs12122434];rs4409690:rs12122434 D'=1.0; r <sup>2</sup> =0.22.<br>p@chr1:63261897..63261900,+ [rs12122434] | 0.19                         | 0.42 |
| p3@FADS2 [rs968567]                                             |                                                                                                                                                                                                                                                                                                | 0.2                          | 0.42 |
| chr6:31808499..31808514,+ [rs599707]                            |                                                                                                                                                                                                                                                                                                | 0.19                         | 0.42 |
| enhancer@chr10:65274637-65275000 [rs10761779]                   |                                                                                                                                                                                                                                                                                                | 0.19                         | 0.45 |
| chr6:160770176..160770186,- [rs474513, rs539298]                |                                                                                                                                                                                                                                                                                                | 0.18                         | 0.48 |
| enhancer@chr6:32913033-32913520 [rs1480380]                     |                                                                                                                                                                                                                                                                                                | 0.16                         | 0.52 |
| enhancer@chr2:227020272-227020467 [rs13404263]                  |                                                                                                                                                                                                                                                                                                | 0.16                         | 0.52 |
| p1@HLA-DQB1 [rs3891175]                                         |                                                                                                                                                                                                                                                                                                | 0.15                         | 0.56 |
| enhancer@chr3:52531917-52532418 [rs13326165]                    |                                                                                                                                                                                                                                                                                                | 0.15                         | 0.59 |
| p9@IFT172 [rs780104, rs79740025, rs6734392]                     |                                                                                                                                                                                                                                                                                                | 0.13                         | 0.61 |
| p@chr10:65121474..65121480,- [rs12355784]                       |                                                                                                                                                                                                                                                                                                | 0.13                         | 0.61 |
| enhancer@chr1:230279464-230279771 [rs4846905]                   |                                                                                                                                                                                                                                                                                                | 0.13                         | 0.61 |

|                                               |                                                                                                     |      |      |
|-----------------------------------------------|-----------------------------------------------------------------------------------------------------|------|------|
|                                               | rs4846905:rs7551742 D'=0.93; r <sup>2</sup> =0.83.<br>enhancer@chr1:230289705-230290142 [rs7551742] | 0.08 | 0.77 |
| enhancer@chr2:28319174-28319559 [rs7568903]   |                                                                                                     | 0.13 | 0.61 |
| chr6:32148013..32148032,+ [rs3134943]         |                                                                                                     | 0.13 | 0.61 |
|                                               | rs3134943:rs3134931 D'=1.0; r <sup>2</sup> =0.08.<br>p@chr6:32190527..32190536,- [rs3134931]        | 0.07 | 0.79 |
|                                               | rs3134943:rs3131283 D'=1.0; r <sup>2</sup> =0.92. p3@PRRT1<br>[rs3131283]                           | 0.03 | 0.88 |
| p3@CPEB4 [rs55946741]                         |                                                                                                     | 0.11 | 0.67 |
| p1@ENST00000451079 [rs12442297]               |                                                                                                     | 0.11 | 0.68 |
| p@chr16:72108093..72108100,+ [rs2000999]      |                                                                                                     | 0.11 | 0.68 |
| enhancer@chr8:19518773-19518959 [rs4921664]   |                                                                                                     | 0.09 | 0.74 |
|                                               | rs4921664:rs7001715 D'=1.0; r <sup>2</sup> =0.66.<br>p@chr8:19507328..19507329,- [rs7001715]        | 0.05 | 0.82 |
| p@chr22:38572651..38572665,+ [rs133017]       |                                                                                                     | 0.08 | 0.77 |
| p@chr16:81610493..81610521,+ [rs11642655]     |                                                                                                     | 0.07 | 0.79 |
| enhancer@chr8:59311673-59312115 [rs1030431]   |                                                                                                     | 0.07 | 0.79 |
| enhancer@chr15:44289112-44289501 [rs6493092]  |                                                                                                     | 0.07 | 0.79 |
| enhancer@chr3:170695585-170695919 [rs7635100] |                                                                                                     | 0.05 | 0.82 |
| enhancer@chr11:61746281-61746413 [rs10792320] |                                                                                                     | 0.05 | 0.83 |
| p@chr2:28524175..28524215,+ [rs12621972]      |                                                                                                     | 0.04 | 0.86 |
| enhancer@chr6:127481688-127482073 [rs9491700] |                                                                                                     | 0.04 | 0.86 |
| enhancer@chr2:227172292-227172683 [rs2713556] |                                                                                                     | 0.02 | 0.91 |
| enhancer@chr15:44431053-44431468 [rs2555389]  |                                                                                                     | 0.01 | 0.94 |
| p8@MAPK10 [rs2869433]                         |                                                                                                     | 0.0  | 1.0  |

| Cell type                   | RRA p   | FDR   |
|-----------------------------|---------|-------|
| small intestine adult pool1 | 2.4e-06 | 0     |
| colon adult pool1           | 0.00099 | 0     |
| small intestine fetal       | 0.0036  | 0     |
| duodenum fetal donor1 tech  | 3.2e-05 | 0.015 |
